# Supplementary material
Source: PubMed Central journal article supplement (PMC4114474)
Supplement: ci5002026_si_001.pdf [file ci5002026_si_001.pdf]

**Table S1. Atom Types Used in Developing Pair Potentials.**

| Atom Types |        |                                          | Atom Types |        |                                               |
|------------|--------|------------------------------------------|------------|--------|-----------------------------------------------|
|            |        | Description                              |            |        | Description                                   |
| Protein    | Ligand |                                          | Protein    | Ligand |                                               |
| C.3        | c.3    | Carbon sp3                               | O.3        | o.3    | Oxygen sp3                                    |
| C.2        | c.2    | Carbon sp2                               | O.2        | o.2    | Oxygen sp2                                    |
| C.AR       | c.ar   | Carbon aromatic, sp1                     | O.CO2      | o.co2  | Oxygen in carboxylate and phosphate groups    |
| C.CAT      | c.cat  | Carbocation                              | P.3        | p.3    | Phosphorous sp3, sulfoxide and sulfone sulfur |
| N.4        | n.4    | Nitrogen sp3, and sp3 positively charged | S.3        | s.3    | Sulfur sp3                                    |
| N.AM       | n.am   | Nitrogen amide                           | MET        | -      | All metals                                    |
| N.PL3      | n.pl3  | Nitrogen trigonal                        | -          | f      | Fluorine                                      |
| N.2        | -      | Nitrogen sp1, sp2 and aromatic           | -          | cl     | Chlorine, Bromine                             |
| -          | n.2    | Nitrogen sp1 and sp2                     |            |        |                                               |
| -          | n.ar   | Nitrogen aromatic                        |            |        |                                               |

**Table S2. Enrichment Performance of Different Cluster Size on Test Set Using ROC-AUC Score for Other Scoring Functions.**

|         | ChemScore |      |      |      |         | GoldScore |      |      |      |         | GBSA |      |      |      |         |
|---------|-----------|------|------|------|---------|-----------|------|------|------|---------|------|------|------|------|---------|
|         | AChE      | AR   | Mdm2 | p38  | trypsin | AChE      | AR   | Mdm2 | p38  | trypsin | AChE | AR   | Mdm2 | p38  | trypsin |
| Crystal | 0.55      | 0.21 | 0.38 | 0.33 | 0.20    | 0.54      | 0.36 | 0.34 | 0.38 | 0.34    | 0.43 | 0.70 | 0.54 | 0.57 | 0.30    |
| 5       | 0.58      | 0.17 | 0.45 | 0.29 | 0.08    | 0.49      | 0.41 | 0.35 | 0.30 | 0.23    | 0.52 | 0.43 | 0.59 | 0.54 | 0.32    |
| 10      | 0.53      | 0.18 | 0.45 | 0.25 | 0.08    | 0.51      | 0.42 | 0.34 | 0.24 | 0.29    | 0.51 | 0.44 | 0.59 | 0.49 | 0.33    |
| 20      | 0.53      | 0.14 | 0.40 | 0.30 | 0.06    | 0.51      | 0.38 | 0.33 | 0.28 | 0.32    | 0.55 | 0.46 | 0.57 | 0.47 | 0.28    |
| 30      | 0.52      | 0.13 | 0.39 | 0.32 | 0.08    | 0.55      | 0.37 | 0.30 | 0.29 | 0.32    | 0.58 | 0.42 | 0.56 | 0.48 | 0.29    |
| 50      | 0.53      | 0.12 | 0.42 | 0.31 | 0.11    | 0.53      | 0.38 | 0.33 | 0.31 | 0.27    | 0.50 | 0.47 | 0.48 | 0.46 | 0.30    |
| 100     | 0.50      | 0.15 | 0.48 | 0.36 | 0.12    | 0.55      | 0.36 | 0.36 | 0.38 | 0.31    | 0.56 | 0.57 | 0.52 | 0.44 | 0.32    |
| 250     | 0.49      | 0.12 | 0.48 | 0.35 | 0.11    | 0.51      | 0.39 | 0.34 | 0.33 | 0.27    | 0.55 | 0.46 | 0.50 | 0.41 | 0.37    |

**Figure S1**

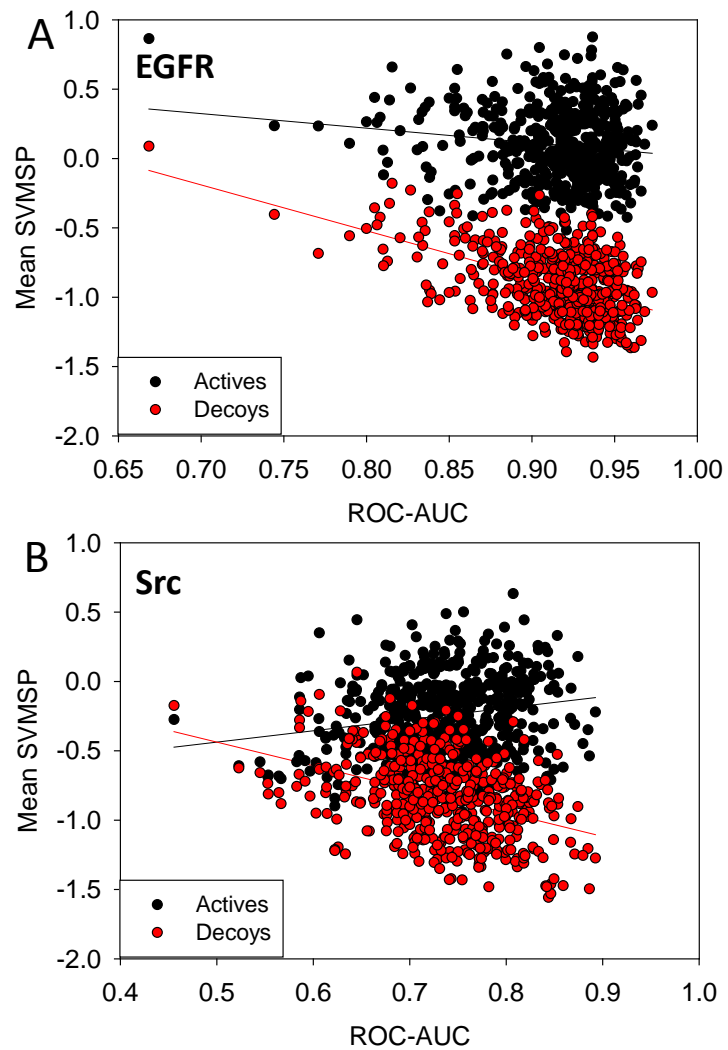

**Figure S1. Regression plots between mean SVMSP score of DUD compounds and ROC-AUC of correspond snapshots. (A) EGFR; and (B) Src. Black dots illustrate ligands, red dots illustrate decoys.**
